# Supplementary material for: Meta-analysis of the correlation between vitamin D and lung cancer risk and outcomes
Source: PubMed Central journal article supplement (PMC5655260; doi:10.18632/oncotarget.18766), 2017-06-28
Supplement: oncotarget-08-81040-s001.pdf [file oncotarget-08-81040-s001.pdf]

# Meta-analysis of the correlation between vitamin D and lung cancer risk and outcomes

## Supplementary Materials

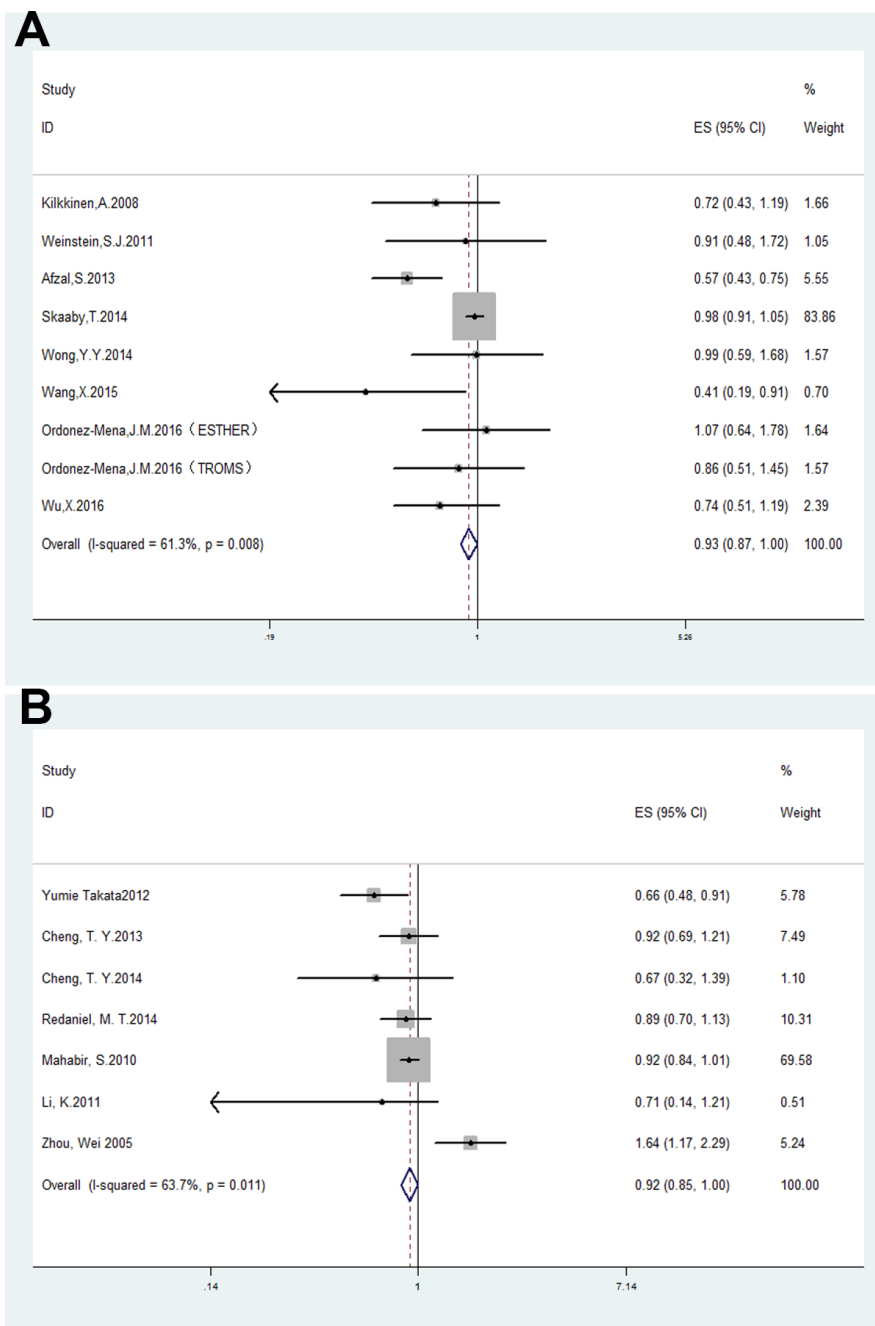

**Supplementary Figure 1:** Forest plots before sensitivity analysis about: (A) serum vitamin D levels and lung cancer risk; and (B) vitamin D intake and lung cancer risk.

**A**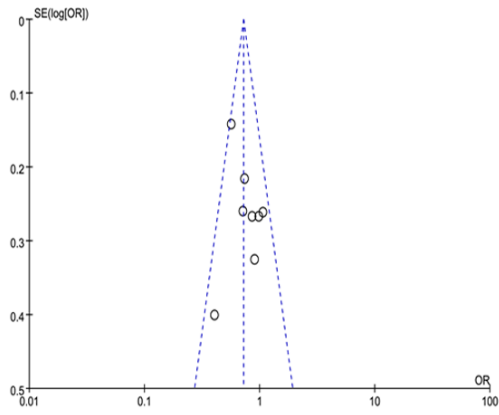**B**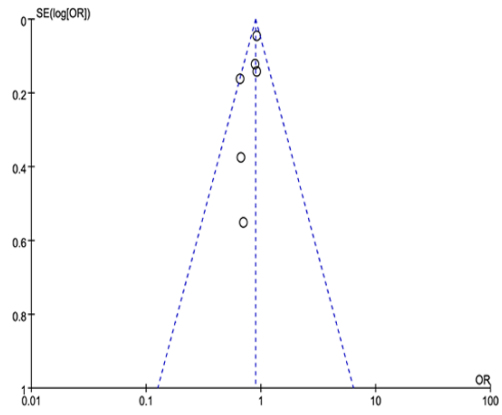**C**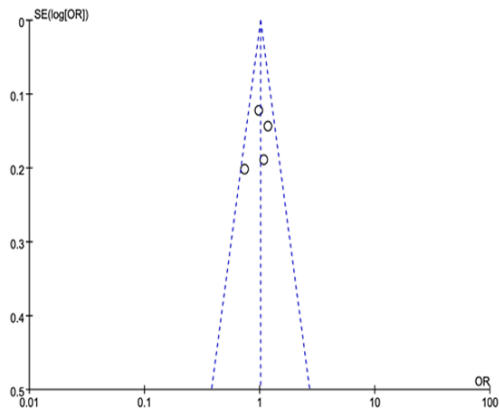**D**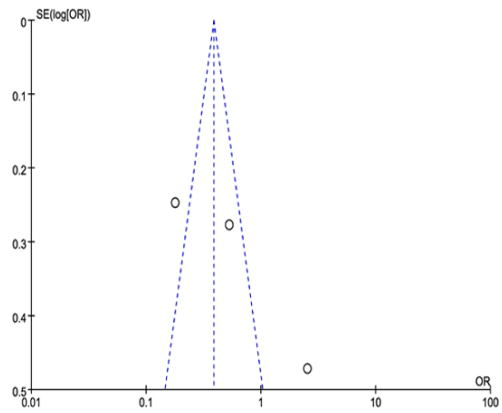

**Supplementary Figure 2:** (A) Funnel plots for serum vitamin D levels and lung cancer risk; (B) Funnel plots for vitamin D dietary intake and lung cancer risk; (C) Funnel plots for serum vitamin D levels and lung cancer survival; (D) Funnel plots for serum vitamin D levels and lung cancer mortality.

**Supplementary Table 1: The PRISMA guidelines.** See [Supplementary\\_Table\\_1](#)
